# Supplementary material for: Use of Flash Glucose-Sensing Technology for 12 months as a Replacement for Blood Glucose Monitoring in Insulin-treated Type 2 Diabetes
Source: PubMed Central journal article supplement — Diabetes Ther. 2017 Apr 11;8(3):573–86. doi: 10.1007/s13300-017-0255-6 (PMC5446381; doi:10.1007/s13300-017-0255-6), 2017-04-11
Supplement: 13300_2017_255_MOESM1_ESM.pdf [file 13300_2017_255_MOESM1_ESM.pdf]

## **Supplementary Appendix:**

Use of flash glucose-sensing technology for 12 months as a replacement for blood glucose monitoring in individuals with insulin-treated type 2 diabetes.

Haak T, Hanaire H, Ajjan R, Hermanns N, Riveline JP, Rayman G.

**Table S1** Anticipated sensor insertion site symptoms

|                     |                 | <b>Open-access Phase Participants<br/>(N=139)</b> |                 |
|---------------------|-----------------|---------------------------------------------------|-----------------|
| <b>Sign/Symptom</b> | <b>Severity</b> | <b>N subjects</b>                                 | <b>N events</b> |
| <b>Erythema:</b>    | Mild            | 11                                                | 32              |
|                     | Moderate        | 10                                                | 29              |
|                     | Severe          | 1                                                 | 1               |
| <b>Pain:</b>        | Mild            | 4                                                 | 4               |
|                     | Moderate        | 1                                                 | 1               |
|                     | Severe          | 0                                                 | 0               |
| <b>Itching:</b>     | Mild            | 9                                                 | 14              |
|                     | Moderate        | 8                                                 | 28              |
|                     | Severe          | 1                                                 | 1               |
| <b>Rash:</b>        | Mild            | 2                                                 | 7               |
|                     | Moderate        | 3                                                 | 5               |
|                     | Severe          | 0                                                 | 0               |
| <b>Bleeding:</b>    | Mild            | 3                                                 | 3               |
|                     | Moderate        | 0                                                 | 0               |
|                     | Severe          | 0                                                 | 0               |
| <b>Edema:</b>       | Mild            | 1                                                 | 1               |
|                     | Moderate        | 2                                                 | 2               |
|                     | Severe          | 2                                                 | 2               |
| <b>Induration:</b>  | Mild            | 1                                                 | 1               |
|                     | Moderate        | 0                                                 | 0               |
|                     | Severe          | 0                                                 | 0               |
| <b>Bruising:</b>    | Mild            | 1                                                 | 1               |
|                     | Moderate        | 2                                                 | 2               |
|                     | Severe          | 0                                                 | 0               |
